# Supplementary material
Source: PubMed Central journal article supplement (PMC4875844)
Supplement: NIHMS786514-supplement-1.pdf [file NIHMS786514-supplement-1.pdf]

# Supplementary Material

## **Long-Term Neighborhood Effects on Diabetes Risk: Quasi-Experimental Evidence from a Refugee Dispersal Policy in Sweden**

Justin S. White, PhD<sup>a,\*</sup>, Rita Hamad, MD<sup>b</sup>, Xinjun Li, MD<sup>c</sup>, Sanjay Basu, PhD<sup>b</sup>,  
Henrik Ohlsson, PhD<sup>c</sup>, Jan Sundquist, MD<sup>c</sup>, Kristina Sundquist, MD<sup>c</sup>

<sup>a</sup> Philip R. Lee Institute for Health Policy Studies, School of Medicine, University of California, San Francisco, San Francisco, CA, USA

<sup>b</sup> Department of Medicine, Stanford University School of Medicine, Stanford, CA, USA

<sup>c</sup> Center for Primary Health Care Research, Lund University/Region Skåne, Malmö University Hospital, Malmö, Sweden

\* Corresponding author. [Justin.White@ucsf.edu](mailto:Justin.White@ucsf.edu)

Supp Table S1. Association between neighborhood deprivation and diabetes prevalence

|                                | Model 1 |               | Model 2 |               |
|--------------------------------|---------|---------------|---------|---------------|
|                                | OR      | 95% CI        | OR      | 95% CI        |
| Deprivation level (ref = low)  |         |               |         |               |
| Moderate                       | 1.25    | (1.09 - 1.43) | 1.15    | (1.01 - 1.31) |
| High                           | 1.39    | (1.20 - 1.60) | 1.22    | (1.07 - 1.38) |
| Age (ref = 25-29)              |         |               |         |               |
| 30-34                          |         |               | 1.42    | (1.25 - 1.60) |
| 35-39                          |         |               | 2.14    | (1.91 - 2.39) |
| 40-44                          |         |               | 3.01    | (2.69 - 3.35) |
| 45-50                          |         |               | 4.94    | (4.40 - 5.53) |
| Male                           |         |               | 0.81    | (0.76 - 0.86) |
| Education (ref = unknown)      |         |               |         |               |
| ≤ 9 years                      |         |               | 0.79    | (0.71 - 0.87) |
| 10–12 years                    |         |               | 0.99    | (0.86 - 1.13) |
| > 12 years                     |         |               | 1.06    | (0.96 - 1.18) |
| Married or cohabitating        |         |               | 0.96    | (0.88 - 1.05) |
| Region (ref = large cities)    |         |               |         |               |
| Southern Sweden, other         |         |               | 1.09    | (0.97 - 1.22) |
| Northern Sweden                |         |               | 1.00    | (0.88 - 1.12) |
| Family size (ref = ≥4)         |         |               |         |               |
| 0                              |         |               | 2.03    | (1.80 - 2.30) |
| 1                              |         |               | 1.57    | (1.40 - 1.77) |
| 2                              |         |               | 1.46    | (1.32 - 1.61) |
| 3                              |         |               | 1.29    | (1.17 - 1.41) |
| Year of arrival fixed effects  | No      |               | Yes     |               |
| Region of origin fixed effects | No      |               | Yes     |               |
| Number of observations         | 61,386  |               | 61,386  |               |

Note: Logistic regression coefficients are expressed as odds ratios. Robust standard errors are clustered by municipality.

Supp Table S2. Distribution of subsequent neighborhood deprivation, by initial neighborhood deprivation

|                            | Initial deprivation |          |       |
|----------------------------|---------------------|----------|-------|
|                            | Low                 | Moderate | High  |
| Deprivation after 5 years  |                     |          |       |
| Low                        | 20.7%               | 7.2%     | 4.4%  |
| Moderate                   | 7.9%                | 19.0%    | 7.5%  |
| High                       | 4.6%                | 7.1%     | 21.7% |
|                            | Total on diagonal   |          | 61.4% |
| Deprivation after 10 years |                     |          |       |
| Low                        | 18.5%               | 9.9%     | 7.4%  |
| Moderate                   | 9.9%                | 12.0%    | 6.4%  |
| High                       | 6.9%                | 10.0%    | 19.0% |
|                            | Total on diagonal   |          | 49.5% |
| Deprivation after 15 years |                     |          |       |
| Low                        | 15.5%               | 9.9%     | 8.0%  |
| Moderate                   | 10.3%               | 13.7%    | 9.0%  |
| High                       | 6.9%                | 10.2%    | 16.6% |
|                            | Total on diagonal   |          | 45.8% |

Note: This shows that subsequent neighborhood deprivation is highly correlated with initial neighborhood deprivation.
